# Supplementary material
Source: PubMed Central journal article supplement (PMC2879752)
Supplement: tpc.110.074831_1.pdf [file tpc.110.074831_1.pdf]

**Supp. table 1.** Sequences of primers used in cloning, qRT-PCR and RT-PCR assays

| Primer name (and use)                 | Forward primer (5' – 3') <sup>1</sup>                                     | Reverse primer (5' – 3') <sup>2</sup>                                     | Product size (bp)     |
|---------------------------------------|---------------------------------------------------------------------------|---------------------------------------------------------------------------|-----------------------|
| TvQR1-GW(Gateway cloning)             | <u>GGGGACAAGTTTGTACAA</u><br><u>AAAAGCAGGCTACTTCCC</u><br>ATTGCCGGCCTTACA | <u>GGGGACCACTTTGTACA</u><br><u>AGAAAGCTGGGTGTCGA</u><br>CGCACAATGAATAACCG | 300(+61) <sup>4</sup> |
| TvQR2-GW(Gateway cloning)             | <u>GGGGACAAGTTTGTACAA</u><br><u>AAAAGCAGGCTACGCGC</u><br>AAGAGATCAAGAAAGG | <u>GGGGACCACTTTGTACA</u><br><u>AGAAAGCTGGGTGACAT</u><br>ATGGGCTACCACCCTTG | 436(+61) <sup>4</sup> |
| TvQR2,TvQR1(combining two sequences)  | TGTAAGGCCGGCATTGGG<br>AACATATGGGCTACCACC<br>CTT                           | CAAGGGTGGTAGCCCAT<br>ATGTTCCCATTTGCCGGC<br>TTTACA                         | 736                   |
| TvQR2,TvQR1-GW(Gateway cloning)       | <u>GGGGACAAGTTTGTACAA</u><br><u>AAAAGCAGGCTACGCGC</u><br>AAGAGATCAAGAAAGG | <u>GGGGACCACTTTGTACA</u><br><u>AGAAAGCTGGGTGTCGA</u><br>CGCACAATGAATAACCG | 736(+61) <sup>4</sup> |
| TvQR1-qRT(qRT-PCR) <sup>3</sup>       | AACGGCATGGTTCGTCCT<br>ATC                                                 | ACCACCTCTCCAGCCAC<br>ATC                                                  | 74                    |
| TvQR1-RT (RT-PCR) <sup>3</sup>        | CTTATGCGTGCGGTTTCAG<br>TA                                                 | AAGCCACCTCCTCCAAA<br>ACT                                                  | 302                   |
| TvQR2-qRT(qRT-PCR) <sup>3</sup>       | AACGAGGTTTGGAAATGAT<br>GG                                                 | TCCGAAGGCTGTCTAGA<br>TCC                                                  | 303                   |
| TvQAN8(qRT-PCR, housekeeping control) | CAGCCCTACACAGCGGAA<br>GA                                                  | TCAGACACGCCAATGAA<br>GA                                                   | 166                   |
| TvActin(RT-PCR, housekeeping control) | GAAACAGCCAAGACCAG<br>CTC                                                  | TGGCCACCATTGTTGTT<br>TTA                                                  | 464                   |

<sup>1</sup>attB1 site underlined<sup>2</sup>attB2 site underlined<sup>3</sup>The primer pairs were designed to amplify a region outside to the region targeted for hairpin to avoid amplification of hpRNA<sup>4</sup>Additional 61 bp for Gate Way cloning
